# Supplementary material for: Prognostic impact of six versus eight cycles of standard regimen in patients with diffuse large B-cell lymphoma: propensity score-matching analysis
Source: PubMed Central journal article supplement — ESMO Open. 2021 Jul 13;6(4):100210. doi: 10.1016/j.esmoop.2021.100210 (PMC8287142; doi:10.1016/j.esmoop.2021.100210), 2021-07-13
Supplement: mmc1.pdf [file mmc1.pdf]

## Figures

Online Supplementary Figure S1. Flowchart for patient selection.

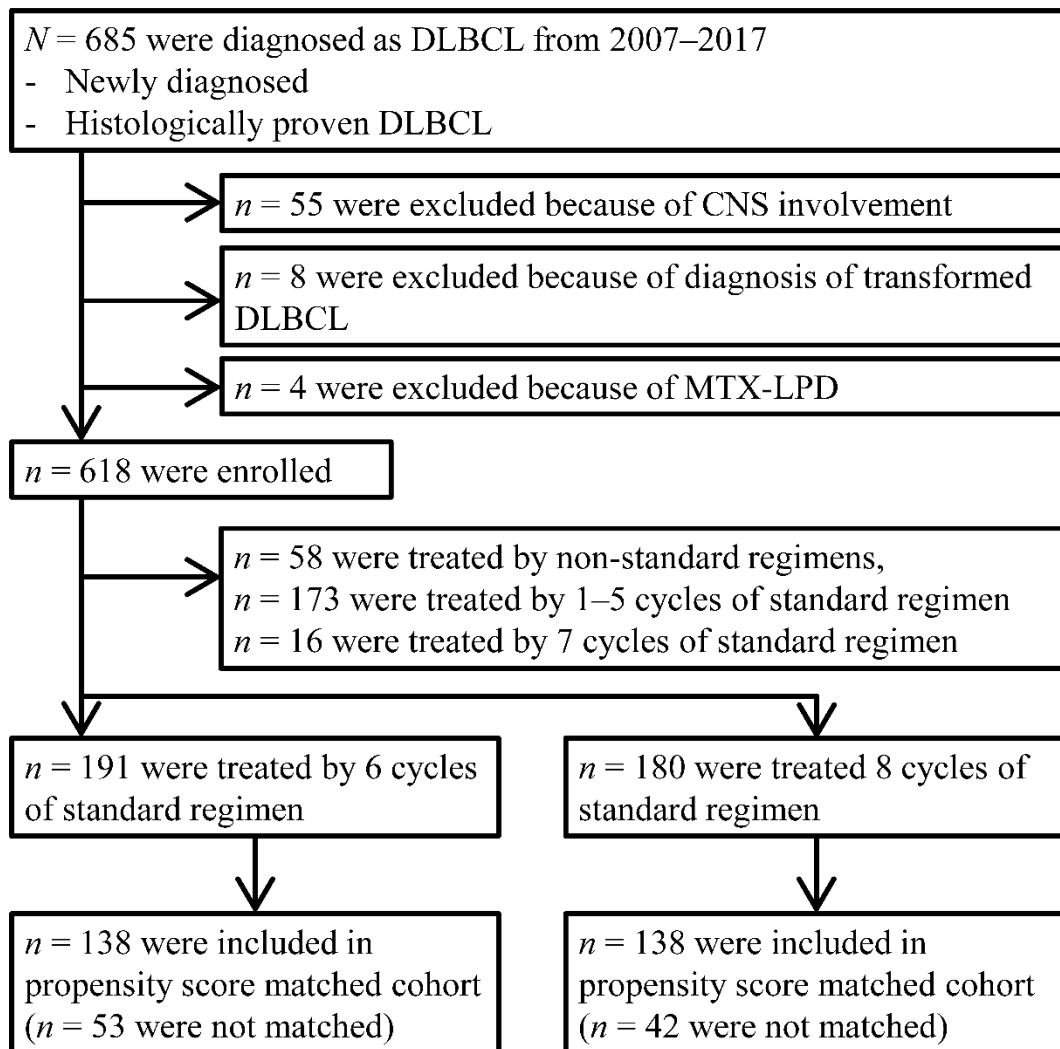

CNS = central nervous system; DLBCL = diffuse large B-cell lymphoma; MTX-LPD = methotrexate-associated lymphoproliferative disorder.

## Online Supplementary Figure S2. Histograms of propensity scores.

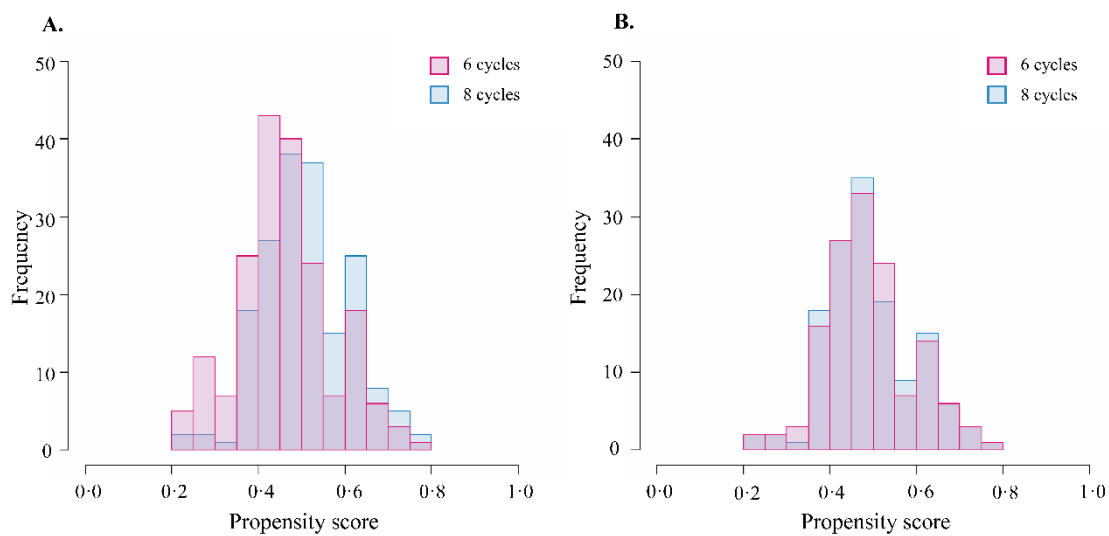

**A)** Original data set. **B)** Matched data set.

Online Supplementary Figure S3. Receiver operating characteristic curves showing c-statistics for propensity scores.

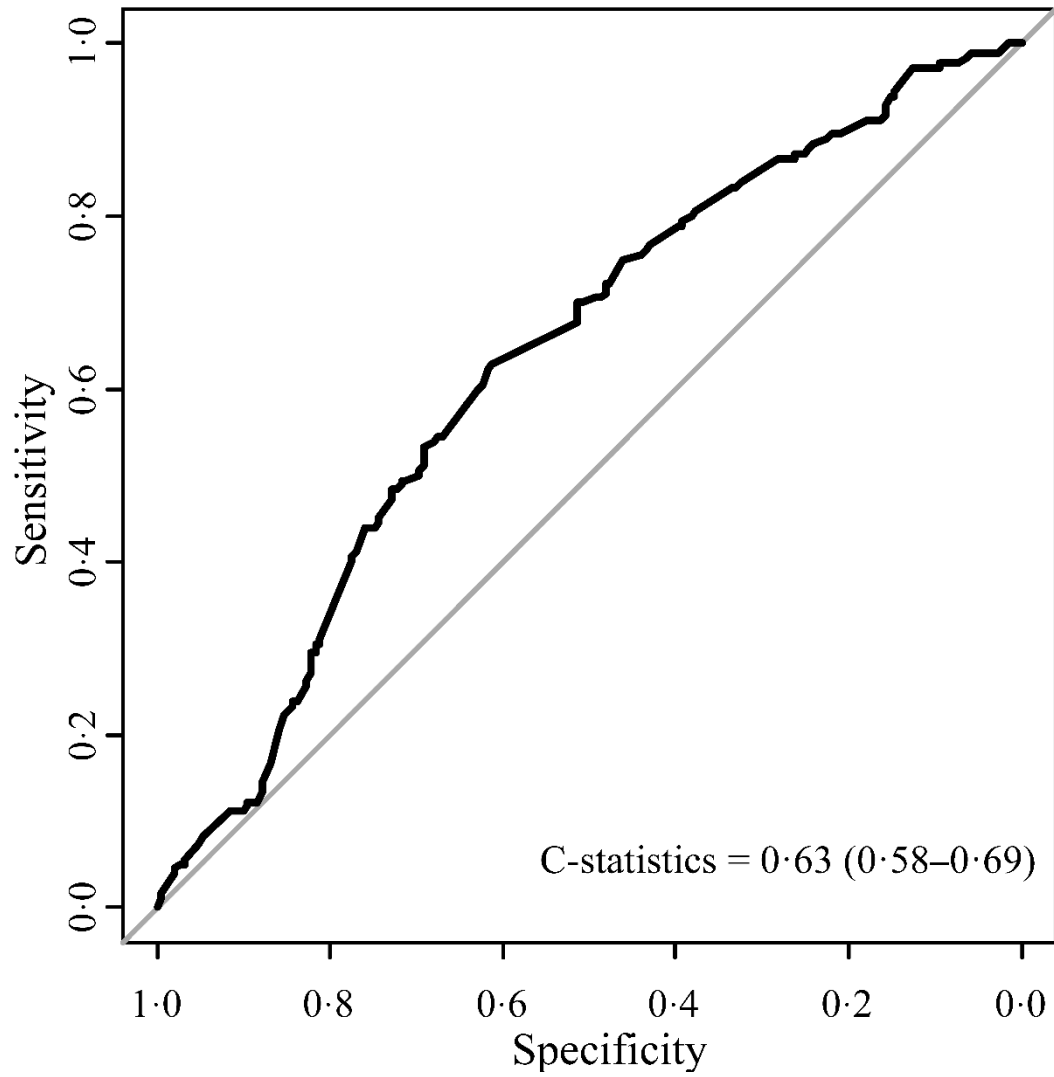

**Online Supplementary Figure S4. Kaplan-Meier survival curve of overall survival using the original data set according to the number of cycles of regimens.**

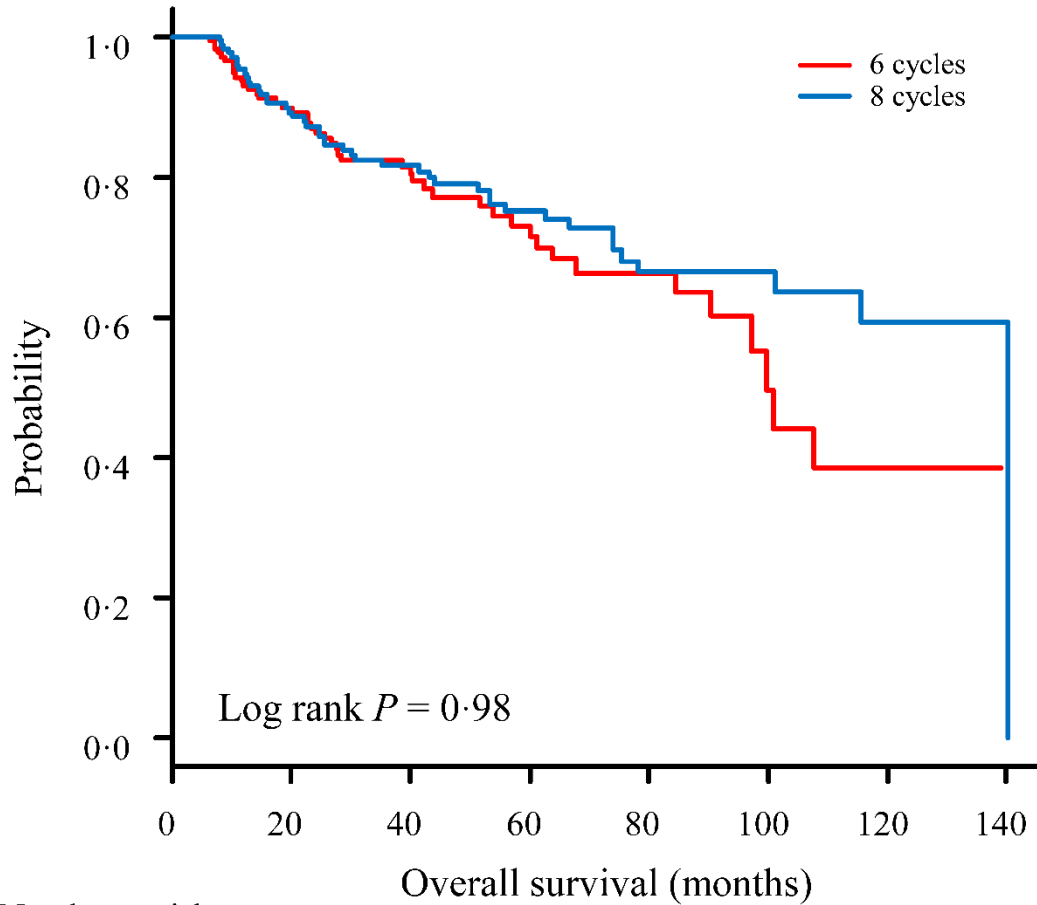

Number at risk:

|          |     |     |     |    |    |    |    |   |
|----------|-----|-----|-----|----|----|----|----|---|
| 6 cycles | 191 | 132 | 80  | 49 | 25 | 9  | 4  | 0 |
| 8 cycles | 180 | 137 | 103 | 68 | 40 | 24 | 10 | 1 |

**Online Supplementary Figure S5. Time-varying Kaplan-Meier survival curve of overall survival using the matched data set according to the number of cycles of regimens.**

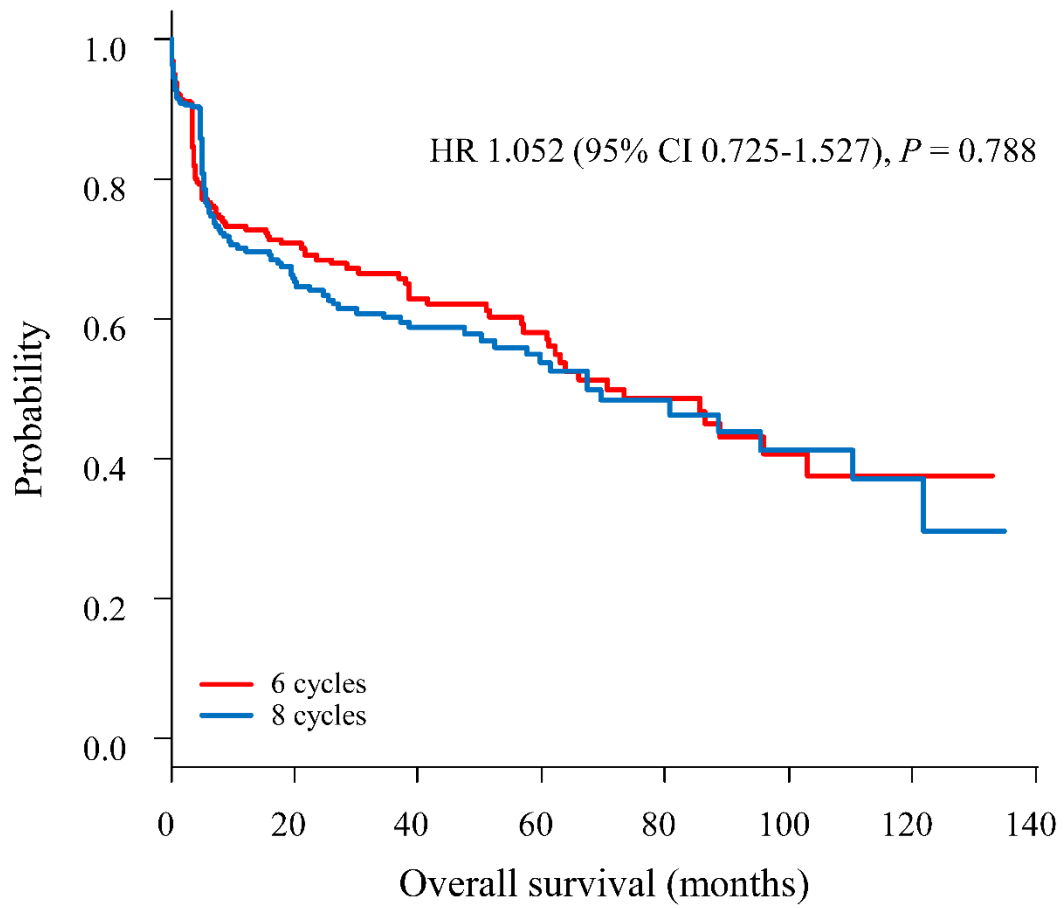

**Online Supplementary Figure S6. Covariate-adjusted Cox hazards model with restricted cubic spline with three knots showing the association between tARDI and overall survival according to the number of cycles of regimens using the original data set.**

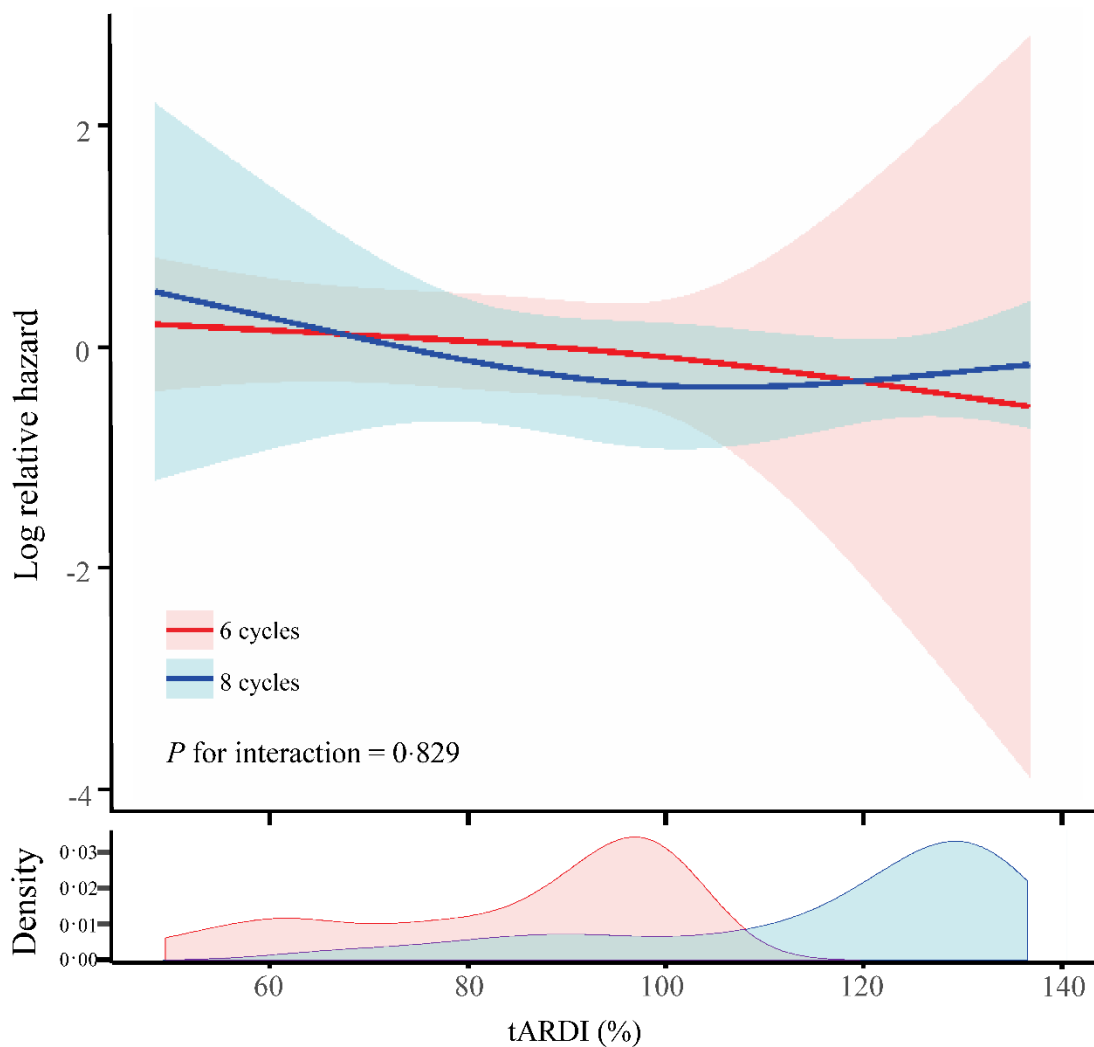

Solid line represents log hazard ratio. Shaded area is the 95% confidence interval.

tARDI = total average relative dose intensity.

**Online Supplementary Figure S7. Covariate-adjusted Cox hazards model with restricted cubic spline with three knots showing the association between age and overall survival according to the number of cycles of regimens using the original data set.**

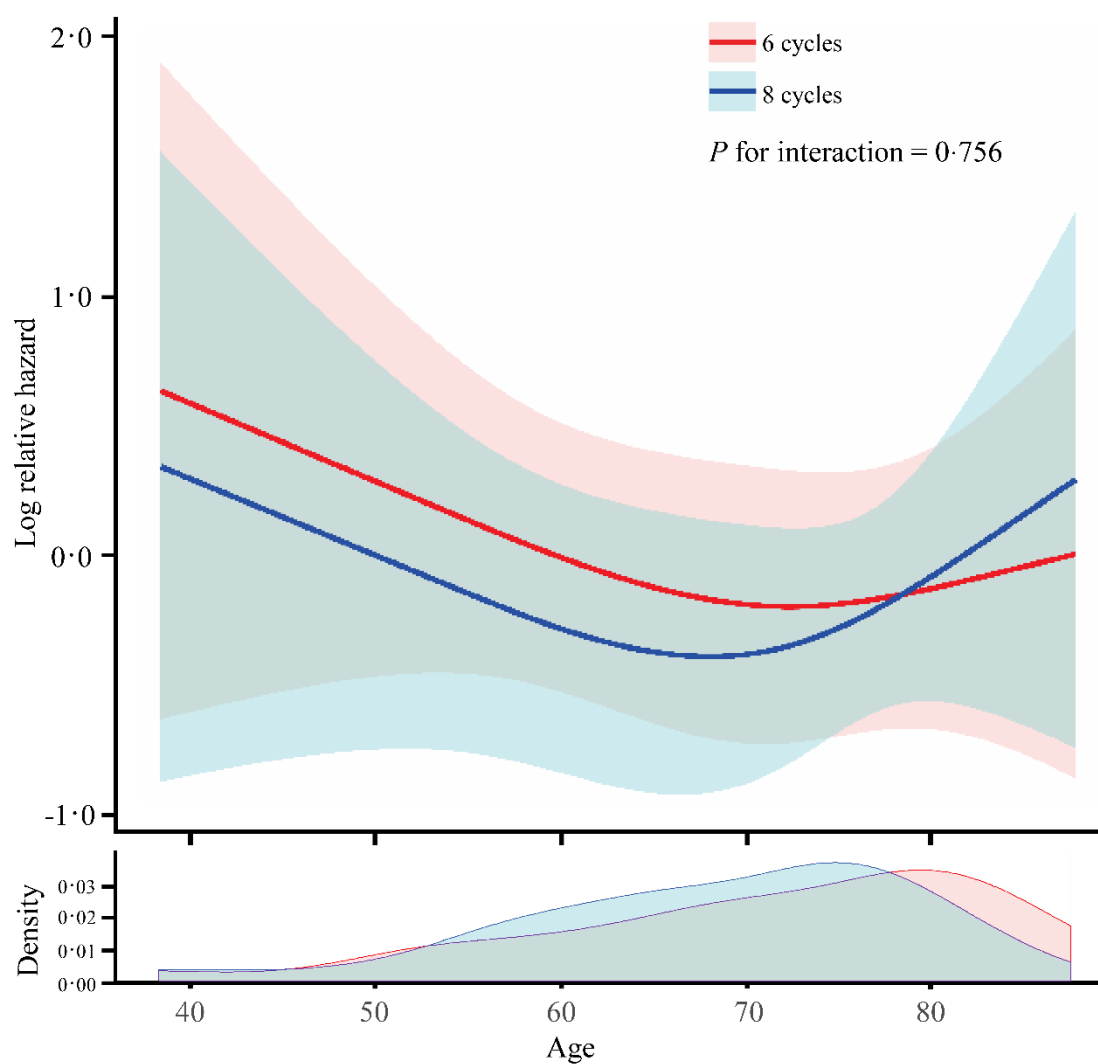

Solid line represents the log hazard ratio. Shaded area is the 95% confidence interval.

**Online Supplementary Figure S8. Covariate-adjusted Cox hazards model with restricted cubic spline with three knots showing associations between tARDI and overall survival of six groups divided by each score of the IPI using the matched data set.**

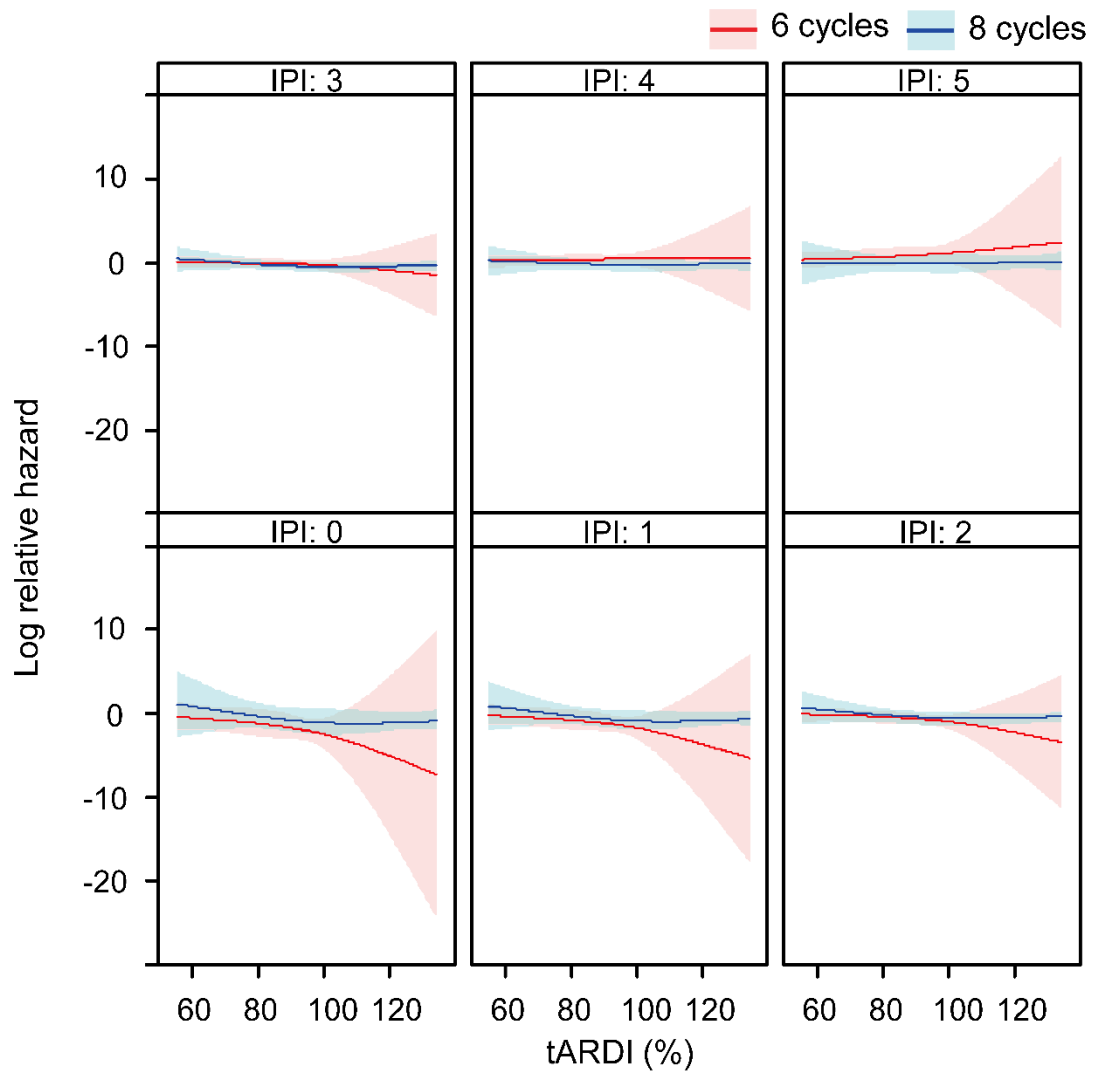

Solid line represents the log hazard ratio. Shaded area is the 95% confidence interval.

IPI = International Prognostic Index; tARDI = total average relative dose intensity.



**Online Supplementary Figure S9. Covariate-adjusted Cox hazards model with restricted cubic spline with three knots showing associations between tARDI and overall survival of six groups divided by each score of the IPI using the original data set.**

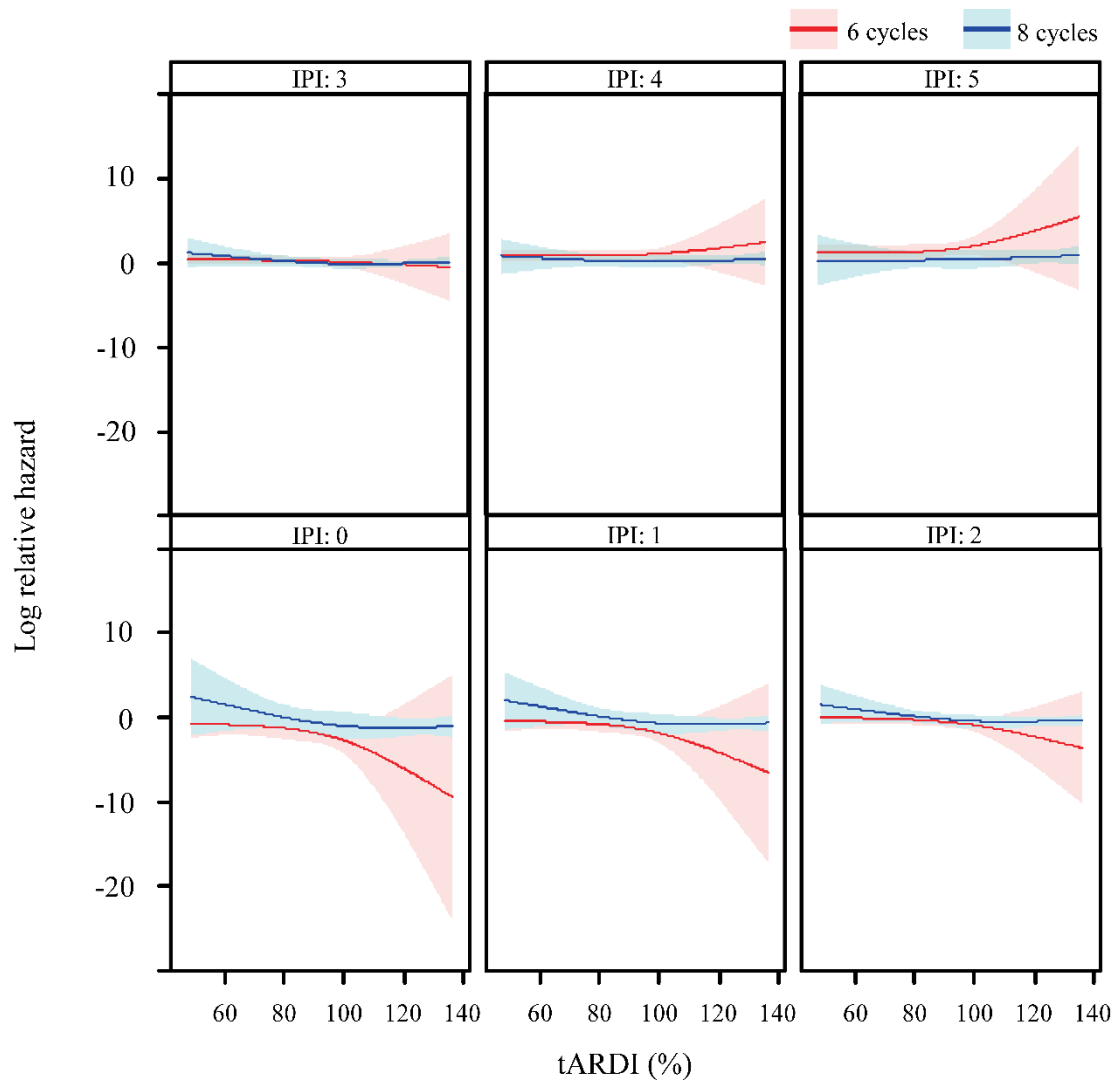

Solid line represents the log hazard ratio. Shaded area is the 95% confidence interval.

IPI = International Prognostic Index; tARDI = total average relative dose intensity.

**Online Supplementary Figure S10. Covariate-adjusted Cox hazards model with restricted cubic spline with three knots showing associations between tARDI and overall survival for binary groups divided by IPI (<3 versus ≥3).**

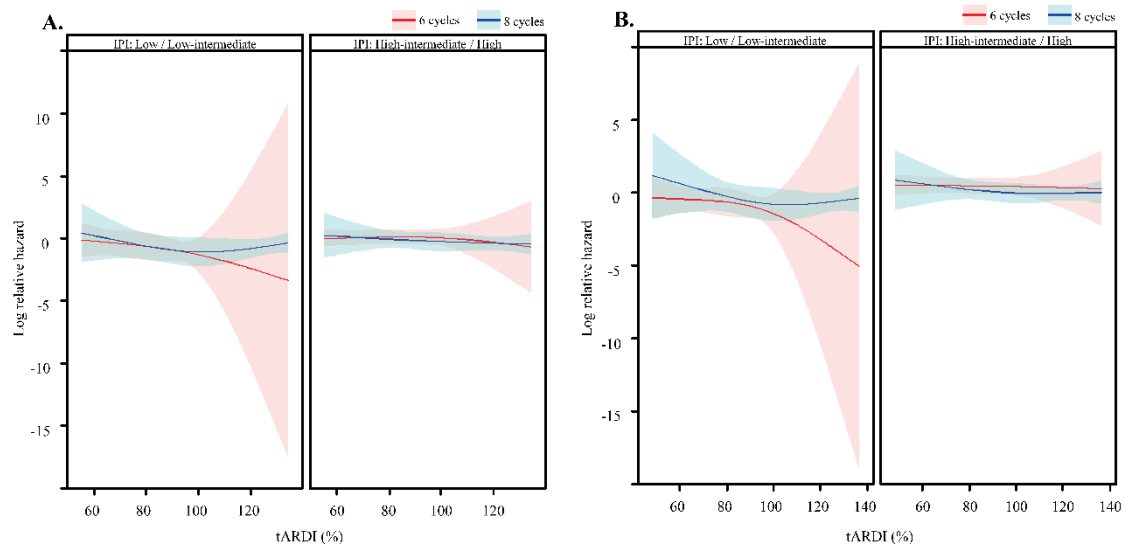

Solid line represents log hazard ratio. Shaded area is the 95% confidence interval. **A)** Matched data set. **B)** Original data set. IPI = International Prognostic Index; tARDI = total average relative dose intensity.

**Online supplementary table 1. Patient characteristics at diagnosis before propensity score matching.**

|                                      | All patients     |              | Six cycles of standard regimens |              | Eight cycles of standard regimens |              | <i>P</i> value | Survivor         |              | Non-survivor    |              | <i>P</i> value |
|--------------------------------------|------------------|--------------|---------------------------------|--------------|-----------------------------------|--------------|----------------|------------------|--------------|-----------------|--------------|----------------|
|                                      | <i>(N = 371)</i> |              | <i>(n = 191)</i>                |              | <i>(n = 180)</i>                  |              |                | <i>(n = 281)</i> |              | <i>(n = 90)</i> |              |                |
| Age, y - median, range               | 71               | (27–90)      | 73                              | (27–90)      | 69                                | (22–87)      | 0.003          | 71               | (27–90)      | 72              | (33–89)      | 0.079          |
| ≥70                                  | 201              | (54.2)       | 113                             | (59.2)       | 88                                | (48.9)       | 0.049          | 148              | (52.7)       | 53              | (58.9)       | 0.332          |
| Male - n (%)                         | 193              | (52.0)       | 105                             | (55.0)       | 88                                | (48.9)       | 0.254          | 143              | (50.9)       | 50              | (55.6)       | 0.469          |
| ECOG PS ≥2 - n (%)                   | 75               | (20.2)       | 43                              | (22.5)       | 32                                | (17.8)       | 0.301          | 40               | (14.2)       | 35              | (38.9)       | <0.001         |
| Extranodal sites ≥2 - n (%)          | 123              | (33.2)       | 59                              | (30.9)       | 64                                | (35.6)       | 0.378          | 87               | (31.0)       | 36              | (40.0)       | 0.124          |
| Ann Arbor stage III/IV - n (%)       | 235              | (63.3)       | 112                             | (58.6)       | 123                               | (68.3)       | 0.067          | 165              | (58.7)       | 70              | (77.8)       | 0.001          |
| Elevated LDH (>ULN) - n (%)          | 236              | (63.6)       | 111                             | (58.1)       | 125                               | (69.4)       | 0.024          | 165              | (58.7)       | 71              | (78.9)       | <0.001         |
| Serum albumin (g/dl) - median, range | 3.6              | (1.1–5.1)    | 3.5                             | (1.4–5.1)    | 3.7                               | (1.1–5.1)    | 0.191          | 3.7              | (1.1–5.1)    | 3.4             | (1.6–4.9)    | 0.001          |
| IPI - n (%)                          |                  |              |                                 |              |                                   |              |                |                  |              |                 |              |                |
| Low / Low intermediate (0-2)         | 173              | (46.6)       | 94                              | (49.2)       | 79                                | (43.9)       | 0.349          | 149              | (53.0)       | 24              | (26.7)       | <0.001         |
| High intermediate / High (≥3)        | 198              | (53.4)       | 97                              | (50.8)       | 101                               | (56.1)       |                | 132              | (47.0)       | 66              | (73.3)       |                |
| NCCN-IPI - n (%)                     |                  |              |                                 |              |                                   |              |                |                  |              |                 |              |                |
| Low / Low intermediate (0-3)         | 137              | (36.9)       | 71                              | (37.2)       | 66                                | (36.7)       | 0.999          | 121              | (43.1)       | 16              | (17.8)       | <0.001         |
| High intermediate / High (≥4)        | 234              | (63.1)       | 120                             | (62.8)       | 114                               | (63.3)       |                | 160              | (56.9)       | 74              | (82.2)       |                |
| Bulky mass - n (%)                   | 77               | (20.8)       | 40                              | (20.9)       | 37                                | (20.6)       | 0.999          | 51               | (18.1)       | 26              | (28.9)       | 0.036          |
| B symptoms - n (%)                   | 119              | (32.1)       | 61                              | (31.9)       | 58                                | (32.2)       | 0.999          | 81               | (28.8)       | 38              | (42.2)       | 0.020          |
| Uric acid (mg/dl) - median, range    | 5.1              | (0.2–23.0)   | 5.3                             | (0.2–14.3)   | 5.0                               | (1.1–23.0)   | 0.169          | 5.0              | (0.2–23.0)   | 5.9             | (0.7–13.7)   | 0.036          |
| ≥7.5 mg/dL                           | 45               | (12.1)       | 23                              | (12.0)       | 22                                | (12.2)       | 0.999          | 29               | (10.3)       | 16              | (17.8)       | 0.065          |
| sIL-2R - median, range               | 1,300            | (125–38,400) | 1,200                           | (168–38,400) | 1,478                             | (125–25,400) | 0.271          | 1,120            | (125–31,000) | 2,740           | (316–38,400) | <0.001         |
| ≥median                              | 185              | (49.9)       | 86                              | (45.0)       | 99                                | (55.0)       | 0.062          | 127              | (45.2)       | 58              | (64.4)       | 0.002          |
| CCI - n (%)                          |                  |              |                                 |              |                                   |              |                |                  |              |                 |              |                |
| Low / Medium (0-2)                   | 321              | (86.5)       | 163                             | (85.3)       | 158                               | (87.8)       | 0.544          | 247              | (87.9)       | 74              | (82.2)       | 0.213          |
| High / Very high (≥3)                | 50               | (13.5)       | 28                              | (14.7)       | 22                                | (12.2)       |                | 34               | (12.1)       | 16              | (17.8)       |                |
| GNRI - n (%)                         |                  |              |                                 |              |                                   |              |                |                  |              |                 |              |                |
| No-risk group (>98)                  | 139              | (37.5)       | 80                              | (41.9)       | 59                                | (32.8)       | 0.086          | 91               | (32.4)       | 48              | (53.3)       | <0.001         |
| Risk group (≤98)                     | 232              | (62.5)       | 111                             | (58.1)       | 121                               | (67.2)       |                | 190              | (67.6)       | 42              | (46.7)       |                |
| Total ARDI                           | 99.0             | (19.2–142.6) | 903                             | (19.2–106.4) | 123.7                             | (61.2–142.6) | <0.001         | 99.6             | (35.4–142.6) | 92.2            | (19.2–138.0) | 0.010          |
| ASCT                                 | 21               | (5.7)        | 15                              | (7.9)        | 6                                 | (3.3)        | 0.073          | 11               | (3.9)        | 10              | (11.1)       | 0.017          |
| Up-front ASCT                        | 13               | (3.5)        | 13                              | (6.8)        | 0                                 | (0.0)        | <0.001         | 7                | (2.5)        | 6               | (6.7)        | 0.092          |
| ASCT as salvage therapy              | 8                | (2.2)        | 2                               | (1.0)        | 6                                 | (3.3)        | 0.164          | 4                | (1.4)        | 4               | (4.4)        | 0.101          |

ASCT = autologous stem cell transplantation; CCI = Charlson Comorbidity Index; ECOG PS = Eastern Cooperative Oncology Group performance status; fTRST = Flemish

version of the Triage Risk Screening Tool; GNRI = Geriatric Nutritional Risk Index; IPI = International Prognostic Index; LDH = lactate dehydrogenase; NCCN = National Comprehensive Cancer Network; sIL-2R = soluble interleukin-2 receptor; SMD = standardized mean difference; ULN = upper limit of normal.

**Online supplementary table 2. Patient characteristics between included and excluded patients.**

|                                      | Standard regimens<br>(N = 560) |              | Standard regimens with<br>1-5, 7 cycles<br>(n = 189) |              | Standard regimens with<br>6, 8 cycles<br>(n = 371) |              | P value |
|--------------------------------------|--------------------------------|--------------|------------------------------------------------------|--------------|----------------------------------------------------|--------------|---------|
| Age, y - median, range               | 73                             | (23–96)      | 76                                                   | (23–96)      | 71                                                 | (27–90)      | <0.001  |
| ≥70                                  | 329                            | (58.8)       | 128                                                  | (67.7)       | 201                                                | (54.1)       | 0.002   |
| Male - n (%)                         | 294                            | (52.5)       | 101                                                  | (53.4)       | 193                                                | (52.0)       | 0.789   |
| ECOG PS ≥2 - n (%)                   | 157                            | (28.0)       | 82                                                   | (43.4)       | 75                                                 | (20.2)       | <0.001  |
| Extranodal sites ≥2 - n (%)          | 189                            | (33.8)       | 66                                                   | (34.9)       | 123                                                | (33.2)       | 0.706   |
| Ann Arbor Stage III/IV - n (%)       | 355                            | (63.4)       | 120                                                  | (63.5)       | 235                                                | (63.3)       | 0.999   |
| Elevated LDH (>ULN) - n (%)          | 356                            | (63.6)       | 120                                                  | (63.5)       | 236                                                | (63.6)       | 0.999   |
| Serum albumin (g/dl) - median, range | 3.5                            | (0.6–5.1)    | 3.3                                                  | (0.6–4.9)    | 3.6                                                | (1.1–5.1)    | 0.001   |
| IPI - n (%)                          |                                |              |                                                      |              |                                                    |              |         |
| Low / Low intermediate (0-2)         | 249                            | (44.5)       | 76                                                   | (40.2)       | 173                                                | (46.6)       | 0.152   |
| High intermediate / High (≥3)        | 311                            | (55.5)       | 113                                                  | (59.8)       | 198                                                | (53.4)       |         |
| NCCN-IPI – n (%)                     |                                |              |                                                      |              |                                                    |              |         |
| Low / Low intermediate (0-3)         | 191                            | (34.1)       | 54                                                   | (28.6)       | 137                                                | (36.9)       | 0.059   |
| High intermediate / High (≥4)        | 369                            | (65.9)       | 135                                                  | (71.4)       | 234                                                | (63.1)       |         |
| Bulky mass - n (%)                   | 114                            | (20.4)       | 37                                                   | (19.6)       | 77                                                 | (20.8)       | 0.741   |
| B symptoms - n (%)                   | 188                            | (33.6)       | 69                                                   | (36.5)       | 119                                                | (32.1)       | 0.254   |
| Uric acid (mg/dl) - median, range    | 5.2                            | (0.2–23.0)   | 5.0                                                  | (0.3–15.6)   | 5.3                                                | (0.2–23.0)   | 0.558   |
| ≥7.5 mg/dL                           | 77                             | (13.8)       | 30                                                   | (15.9)       | 47                                                 | (12.7)       | 0.302   |
| sIL-2R - median, range               | 1,415                          | (104–61,900) | 1,466                                                | (104–61,900) | 1,336                                              | (125–38,400) | 0.668   |
| ≥median                              | 269                            | (48.0)       | 95                                                   | (50.3)       | 174                                                | (46.9)       | 0.475   |
| CCI - n (%)                          |                                |              |                                                      |              |                                                    |              |         |
| Low / Medium (0-2)                   | 237                            | (42.3)       | 58                                                   | (30.7)       | 179                                                | (48.2)       | <0.001  |
| High / Very high (≥3)                | 323                            | (57.7)       | 131                                                  | (69.3)       | 192                                                | (51.8)       |         |
| GNRI - n (%)                         |                                |              |                                                      |              |                                                    |              |         |
| No-risk group (>98)                  | 217                            | (38.8)       | 60                                                   | (31.7)       | 157                                                | (42.3)       | 0.013   |
| Risk group (≤98)                     | 343                            | (61.2)       | 129                                                  | (68.3)       | 214                                                | (57.7)       |         |
| ASCT                                 | 25                             | (4.5)        | 4                                                    | (2.1)        | 21                                                 | (5.7)        | 0.081   |
| Up-front ASCT                        | 14                             | (2.5)        | 1                                                    | (0.5)        | 13                                                 | (3.5)        | 0.042   |
| ASCT as salvage therapy              | 11                             | (2.0)        | 3                                                    | (1.6)        | 8                                                  | (2.2)        | 0.999   |

ASCT = autologous stem cell transplantation; CCI = Charlson Comorbidity Index; ECOG PS = Eastern Cooperative Oncology Group performance status; fTRST = Flemish

version of the Triage Risk Screening Tool; GNRI = Geriatric Nutritional Risk Index; IPI = International Prognostic Index; LDH = lactate dehydrogenase; NCCN = National Comprehensive Cancer Network; sIL-2R = soluble interleukin-2 receptor; ULN = upper limit of normal.

**Online supplementary table 3. Time-varying Cox regression analysis of clinical factors significantly associated with overall survival.**

|                                   | HR (95%CI)          | <i>P</i> value |
|-----------------------------------|---------------------|----------------|
| Male                              | 1.227 (0.815-1.791) | 0.289          |
| IPI, score                        | 1.257 (1.067-1.480) | 0.006          |
| Bulky mass                        | 1.290 (0.856-1.943) | 0.224          |
| CCI, score                        | 1.092 (0.970-1.229) | 0.147          |
| GNRI, score                       | 0.989 (0.975-1.003) | 0.133          |
| Total ARDI, %                     | 0.992 (0.983-1.001) | 0.075          |
| Eight cycles of standard regimens | 1.538 (0.947-2.498) | 0.082          |

ARDI = average relative dose intensity; CCI = Charlson Comorbidity Index; CI = confidence intervals; GNRI = Geriatric Nutritional Risk Index; HR = hazard ratio; IPI = International Prognostic Index.

**Online supplementary table 4. Occurrence of non-hematological toxicity or febrile neutropenia  $\geq$  grade 3.**

|                                       | All patients |        | Six cycles of<br>standard regimens |        | Eight cycles of<br>standard regimens |        | <i>P</i> value |
|---------------------------------------|--------------|--------|------------------------------------|--------|--------------------------------------|--------|----------------|
| Original data                         |              |        |                                    |        |                                      |        |                |
| Adverse event (Grade $\geq$ 3), n (%) | (N = 371)    |        | (n = 191)                          |        | (n = 180)                            |        |                |
| Febrile neutropenia                   | 157          | (42.3) | 74                                 | (38.7) | 83                                   | (46.1) | 0.172          |
| Non-hematological toxicity            | 117          | (31.5) | 59                                 | (30.9) | 58                                   | (32.2) | 0.823          |
| Matched data                          |              |        |                                    |        |                                      |        |                |
| Adverse event (Grade $\geq$ 3), n (%) | (N = 276)    |        | (n = 138)                          |        | (n = 138)                            |        |                |
| Febrile neutropenia                   | 125          | (45.3) | 56                                 | (40.6) | 69                                   | (50.0) | 0.147          |
| Non-hematological toxicity            | 93           | (33.7) | 48                                 | (34.8) | 45                                   | (32.6) | 0.799          |



**Online supplementary table 5. Multivariate logistic regression analysis for clinical factors associated with the occurrence of severe adverse events  $\geq$  grade 3.**

|                                   | OR (95% CI)         | <i>P</i> value |
|-----------------------------------|---------------------|----------------|
| Male                              | 0.828 (0.531–1.290) | 0.407          |
| IPI, score                        | 1.250 (1.040–1.500) | 0.017          |
| Serum albumin, g/dL               | 0.721 (0.508–1.020) | 0.068          |
| Bulky mass                        | 2.170 (1.190–3.950) | 0.011          |
| Total ARDI, %                     | 1.010 (0.995–1.020) | 0.218          |
| CCI score, /point                 | 1.180 (0.995–1.400) | 0.058          |
| Eight cycles of standard regimens | 0.885 (0.483–1.620) | 0.694          |

ARDI = average relative dose intensity; CCI = Charlson Comorbidity Index; CI = confidence intervals; G8 = Geriatric 8; IPI = International Prognostic Index; OR = odds ratio.
